# Supplementary material for: Increased cardiovascular risk and reduced quality of life are highly prevalent among individuals with hepatitis C
Source: PubMed Central journal article supplement — BMJ Open Gastroenterol. 2020 Aug 26;7(1):e000470. doi: 10.1136/bmjgast-2020-000470 (PMC7451276; doi:10.1136/bmjgast-2020-000470), 2020-08-26
Supplement: bmjgast-2020-000470supp001.pdf [file bmjgast-2020-000470supp001.pdf]

**Supplementary Table 1: Relationship between the hepatitis specific scores (HD, PWB, HLIM, HHD) and clinical factors.** (HD, hepatitis distress scale; PWB, positive wellbeing; HLIM, hepatitis-specific limitations scale; HHD, hepatitis specific health distress scale)

| Factor                          | HD                                   | P value          | PWB                                  | P value          | HLIM                                     | P value      | HHD                                    | P value          |
|---------------------------------|--------------------------------------|------------------|--------------------------------------|------------------|------------------------------------------|--------------|----------------------------------------|------------------|
| <b>Gender</b>                   |                                      | 0.75             |                                      | 0.43             |                                          | 0.77         |                                        | 0.83             |
| Male                            | 45.0 (15.0-80.0)                     |                  | 47.5 (15.0-80.0)                     |                  | 100.0 (66.7-100.0)                       |              | 82.5 (45.0-100.0)                      |                  |
| Female                          | 60.0 (35.0-85.0)                     |                  | 45.0 (25.0-70.0)                     |                  | 100.0 (70.0-100.0)                       |              | 80.0 (50.0-100.0)                      |                  |
| <b>Age</b>                      | $r_s = 0.14$                         | 0.18             | $r_s = 0.09$                         | 0.22             | $r_s = 0.03$                             | 0.081        | $r_s = 0.26$                           | <b>0.010</b>     |
| <b>HCV status</b>               |                                      | 0.15             |                                      | <b>0.04</b>      |                                          | <b>0.029</b> |                                        | <b>0.004</b>     |
| Viraemic                        | 45.0 (15.0-70.0)                     |                  | <b>37.5 (20.0-55.0)</b>              |                  | <b>83.3 (40.0-100.0)</b>                 |              | <b>60.0 (15.0-85.0)</b>                |                  |
| SVR                             | 60.0 (20.0-85.0)                     |                  | <b>55.0 (30.0-80.0)</b>              |                  | <b>100.0 (80.0-100.0)</b>                |              | <b>90.0 (60.0-100.0)</b>               |                  |
| <b>Cirrhosis</b>                |                                      | 0.008            |                                      | 0.43             |                                          | 0.97         |                                        | <b>0.02</b>      |
| No                              | 57.5 (17.5-82.5)                     |                  | 45.0 (30.0-70.0)                     |                  | 100.0 (70.0-100.0)                       |              | <b>72.5 (42.5-97.5)</b>                |                  |
| Yes                             | 50.0 (20.0-80.0)                     |                  | 55.0 (15.0-80.0)                     |                  | 100.0 (66.7-100.0)                       |              | <b>100.0 (60.0-100.0)</b>              |                  |
| <b>BMI</b>                      | $r_s = -0.01$                        | 0.90             | $r_s = -0.01$                        | 0.93             | $r_s = 0.03$                             | 0.80         | $r_s = 0.02$                           | 0.83             |
| <b>Metabolic syndrome</b>       |                                      | 0.10             |                                      | 0.08             |                                          | 0.16         |                                        | 0.93             |
| No                              |                                      |                  |                                      |                  |                                          |              |                                        |                  |
| yes                             | 60.0 (25.0-92.5)<br>40.0 (15.0-75.0) |                  | 55.0 (30.0-75.0)<br>35.0 (25.0-62.5) |                  | 100.0 (80.0-100.0)<br>100.0 (33.3-100.0) |              | 80.0 (52.5-100.0)<br>90.0 (20.0-100.0) |                  |
| <b>Current smoker</b>           |                                      | <b>0.02</b>      |                                      | 0.52             |                                          | 0.25         |                                        | 0.74             |
| No                              | <b>72.5 (25.0-95.0)</b>              |                  | 62.5 (35.0-80.0)                     |                  | 100.0 (73.3-100.0)                       |              | 80.0 (55.0-100.0)                      |                  |
| Yes                             | <b>35.0 (15.0-60.0)</b>              |                  | 40.0 (25.0-65.0)                     |                  | 100.0 (66.7-100.0)                       |              | 70.0 (32.5-100.0)                      |                  |
| <b>QRISK3</b>                   | $r_s = 0.02$                         | 0.87             | $r_s = 0.06$                         | 0.58             | $r_s = -0.01$                            | 0.93         | $r_s = 0.22$                           | <b>0.04</b>      |
| <b>AUDIT score</b>              |                                      | 0.20             |                                      | 0.33             |                                          | 0.75         |                                        | 0.97             |
| <8                              | 60.0 (20.0-85.0)                     |                  | 50.0 (25.0-70.0)                     |                  | 100.0 (66.7-100.0)                       |              | 80.0 (50.0-100.0)                      |                  |
| 8 or greater                    | 32.5 (15.0-80.0)                     |                  | 37.5 (27.5-67.5)                     |                  | 100.0 (60.0-100.0)                       |              | 80.0 (40.0-100.0)                      |                  |
| <b>Current substance misuse</b> |                                      | <b>0.02</b>      |                                      | 0.54             |                                          | 0.10         |                                        | 0.32             |
| No                              | <b>60.0 (22.5-87.5)</b>              |                  | 47.5 (27.5-70.0)                     |                  | 100.0 (80.0-100.0)                       |              | 80.0 (55.0-100.0)                      |                  |
| Yes                             | <b>15.0 (00.0-55.0)</b>              |                  | 35.0 (25.0-70.0)                     |                  | 93.3 (20.0-100.0)                        |              | 75.0 (15.0-100.0)                      |                  |
| <b>Moderate exercise</b>        |                                      | <b>0.02</b>      |                                      | <b>0.01</b>      |                                          | 0.06         |                                        | 0.12             |
| No                              | <b>40.0 (15.0-80.0)</b>              |                  | <b>42.5 (15.0-65.0)</b>              |                  | 100.0 (50.0-100.0)                       |              | 72.5 (22.5-100.0)                      |                  |
| Yes                             | <b>70.0 (35.0-87.5)</b>              |                  | <b>60.0 (35.0-80.0)</b>              |                  | 100.0 (86.7-100.0)                       |              | 85.0 (67.5-100.0)                      |                  |
| <b>Psychiatric disorder</b>     |                                      | <b>&lt;0.001</b> |                                      | <b>&lt;0.001</b> |                                          | 0.07         |                                        | <b>&lt;0.001</b> |
| No                              | <b>75.0 (50.0-95.0)</b>              |                  | <b>70.0 (37.5-80.0)</b>              |                  | 100.0 (80.0-100.0)                       |              | <b>97.5 (68.8-100.0)</b>               |                  |
| Yes                             | <b>25.0 (15.0-60.0)</b>              |                  | <b>35.0 (15.0-55.0)</b>              |                  | 93.3 (56.7-100.0)                        |              | <b>65.0 (20.0-90.0)</b>                |                  |
| <b>Index of deprivation</b>     | $r_s = 0.22$                         | <b>0.03</b>      | $r_s = 0.31$                         | <b>0.002</b>     | $r_s = 0.03$                             | 0.75         | $r_s = -0.02$                          | 0.89             |
